# Supplementary material for: Killer-like receptors and GPR56 progressive expression defines cytokine production of human CD4+ memory T cells
Source: PubMed Central journal article supplement (PMC6531457; doi:10.1038/s41467-019-10018-1), 2019-05-22
Supplement: 41467_2019_10018_MOESM1_ESM.pdf [file 41467_2019_10018_MOESM1_ESM.pdf]

## **Supplementary information**

“Progressive expression of killer-like receptors and GPR56 defines cytokine production of human CD4+ memory T-cells”

Truong, Schlickeiser et al.

Supplementary figure 1: TIM-3, TIGIT, LAG-3 and PD-1 surface expression in human circulating CD4<sup>+</sup> T cell subsets

**A CD45RA/CCR7-based path**

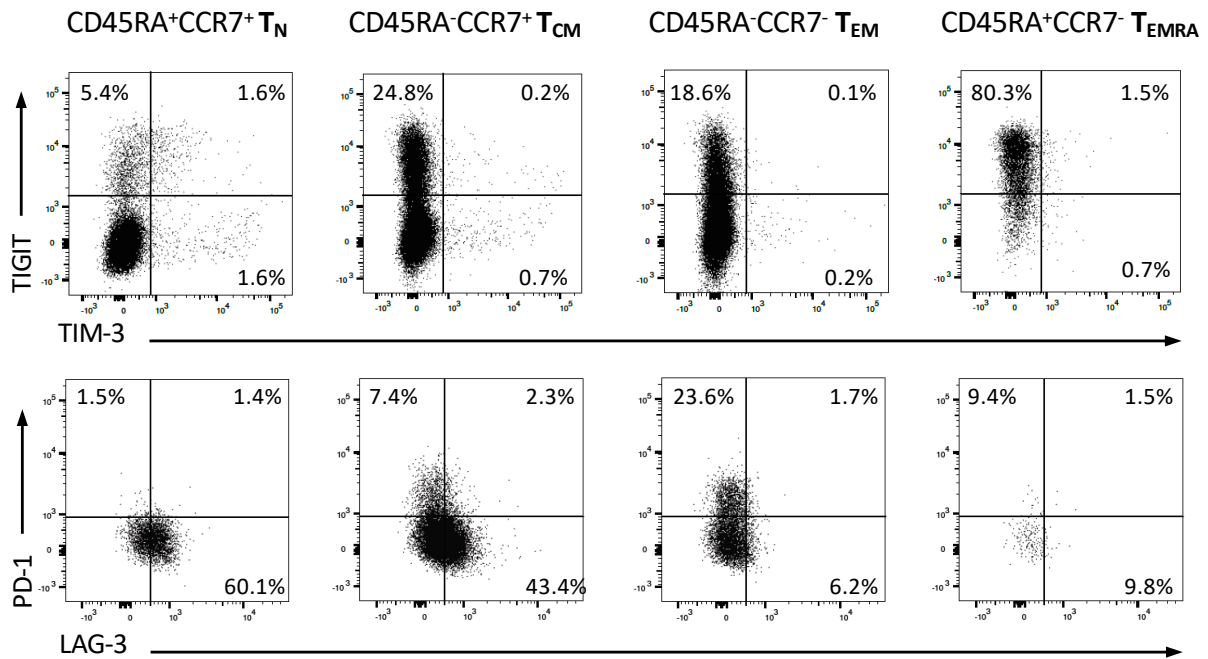

**B KLR/GPR56-based path**

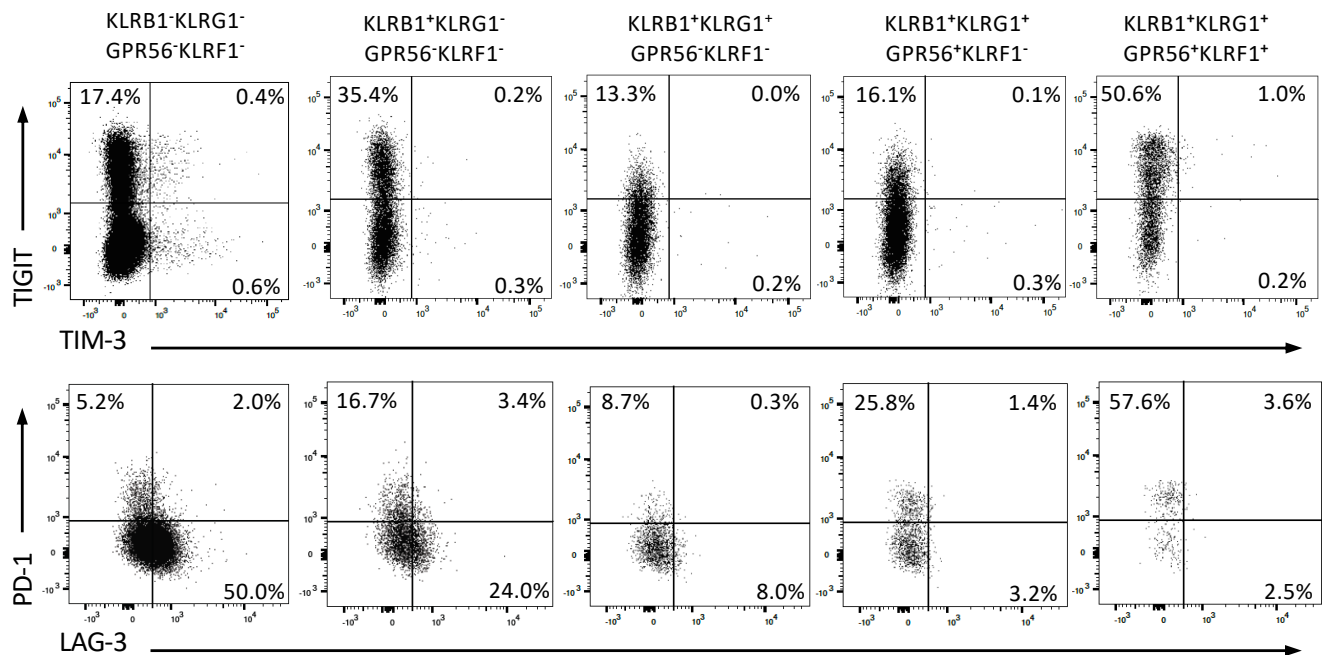

Exemplary dot plots of co-inhibitory/exhaustion receptors within (A) CD45RA/CCR7-based or (B) KLR/GPR56-based classification of human CD4<sup>+</sup> T cell subsets from blood of healthy donors.

Supplementary figure 2: Association of killer-like receptors (KLR) and GPR56 expression with IL-4 & IL-17A production upon PMA/Ionomycin stimulation

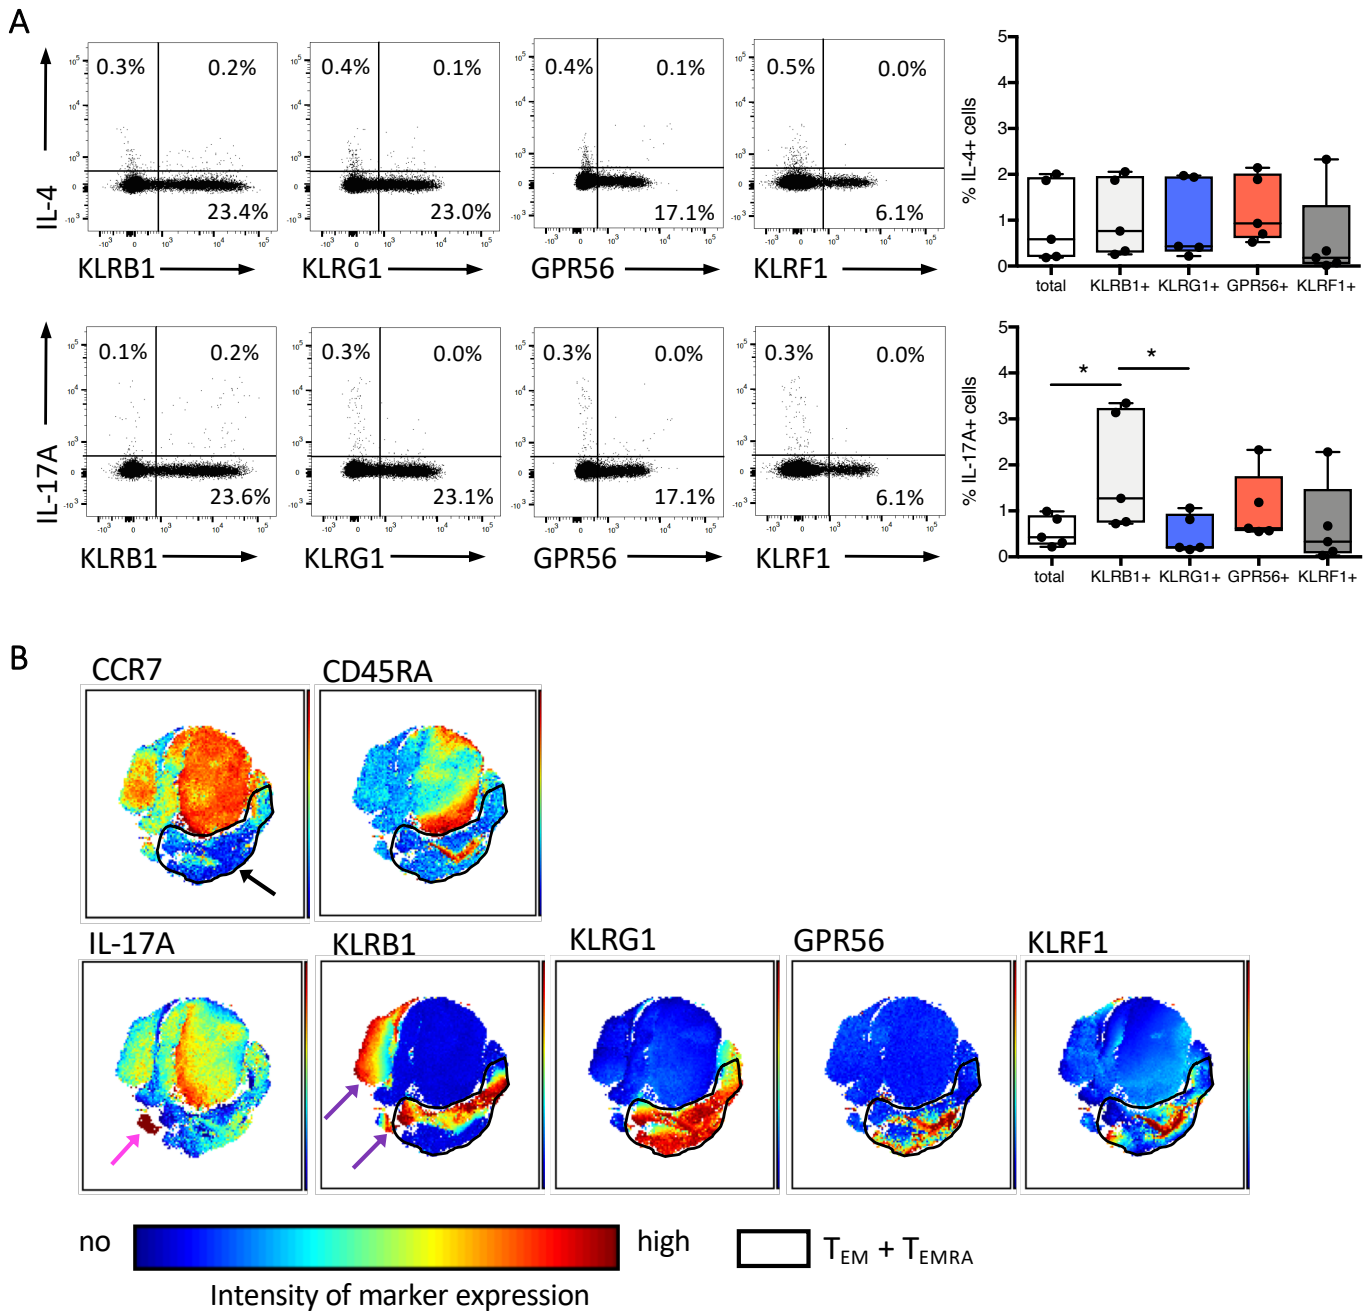

(A) Exemplary dot plots and summarising box plots revealing association of surface marker expression with IL-4 & IL-17A expression potential of CD4<sup>+</sup> T cells from peripheral blood of healthy individuals upon PMA/Ionomycin stimulation (n = 5). Whiskers extend to minimum and maximum. P values were determined by non-parametric matched-pairs Friedman test with post-hoc Dunn's multiple comparison test. \*p < 0.05.

(B) Representative t-SNE plots showing surface marker and cytokine expression pattern of pre-gated CD4<sup>+</sup> T cells (excluding CD25<sup>high</sup>CD127<sup>low</sup> Treg cells) upon short-term PMA/Ionomycin stimulation. The highlighted area marks CD4<sup>+</sup> T<sub>EM</sub> and T<sub>EMRA</sub> cells identified by the absence of CCR7 and the expression pattern of CD45RA. The pink error identifies high IL-17A producers residing outside of the TEM + TEMRA area but showing expression of KLRB1 only.

Supplementary figure 3: Comparative analysis of IFN- $\gamma$  & TNF co-production in KLR / GPR56 expressing subsets upon stimulation with PMA / Ionomycin, staphylococcus enterotoxin B (SEB), tetanus toxoid (TT) or cytomegalovirus peptide (CMV)

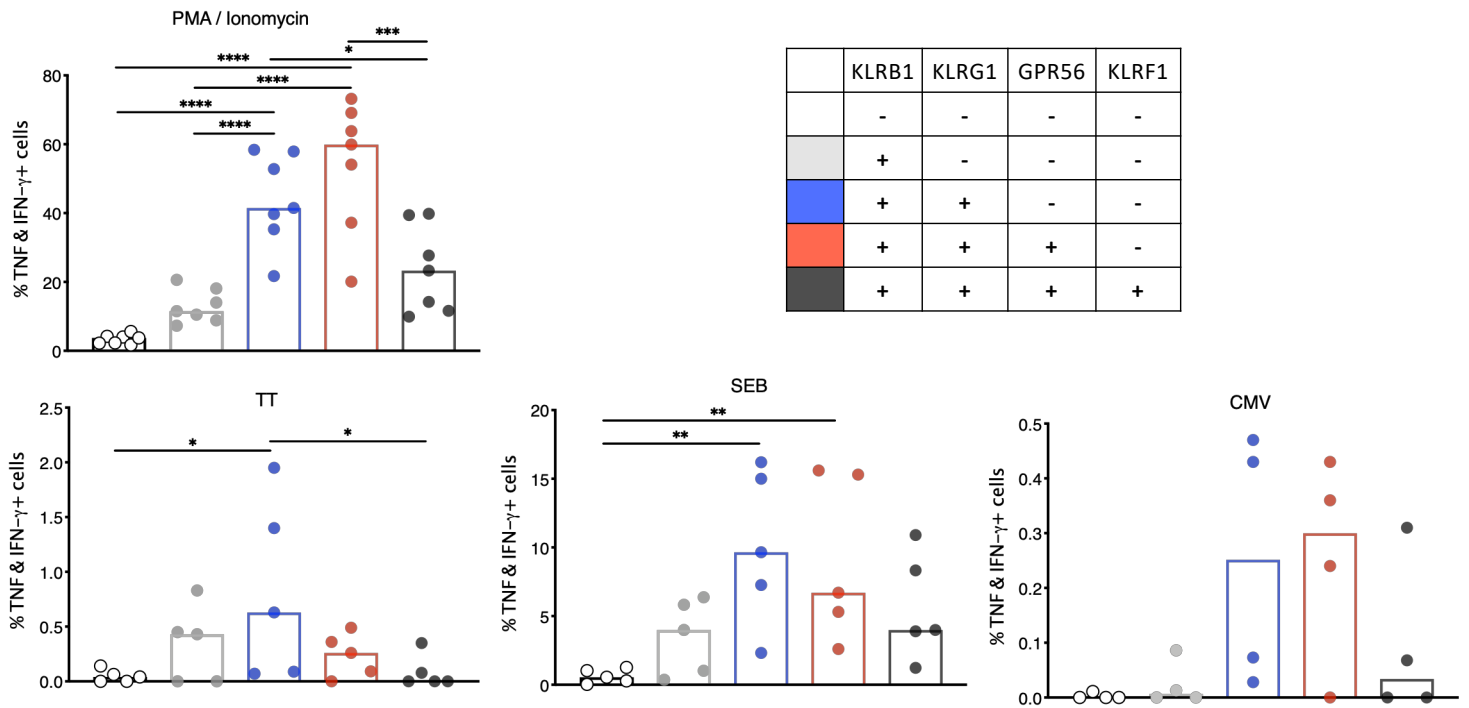

Interleaved scatter plots with medians revealing association of surface marker expression with cytokine expression of CD4<sup>+</sup> T cells from peripheral blood of healthy individuals upon stimulation with PMA / Ionomycin (n = 5) for six hours, SEB (n = 5), TT (n = 5) and CMV peptide (IE+pp65, n = 4) for 24 hours. \*p<0.05, \*\*\*p<0.001, \*\*\*\*p<0.0001 (non-parametric matched-pairs Friedman test with post-hoc Dunn's correction for multiple comparison)

Supplementary figure 4: Decreased proportions of *KLRF1* transcribing T<sub>EM</sub> cells in liver of patients with inflammatory biliary and hepatic diseases

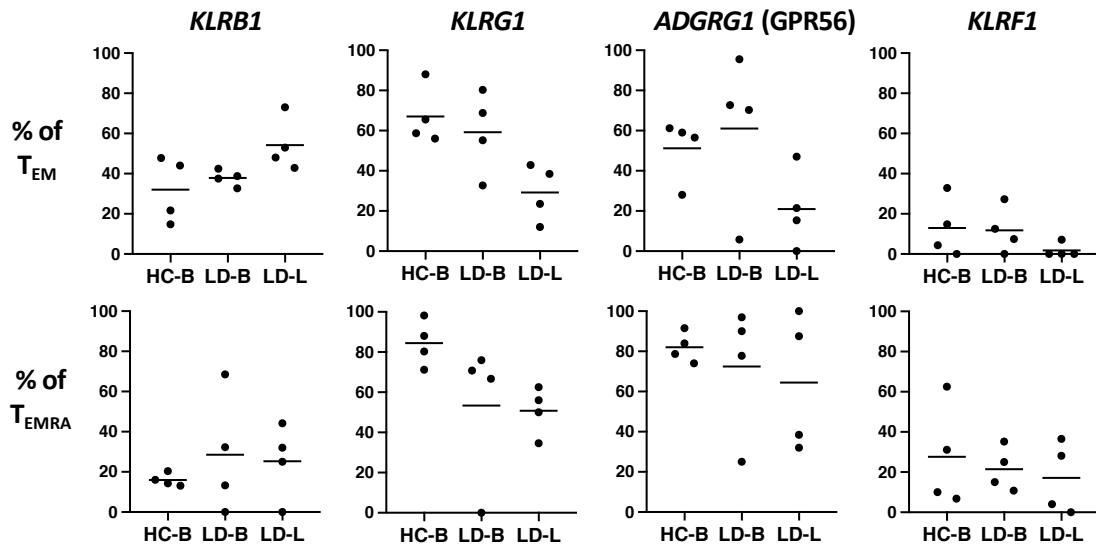

Frequency of T<sub>EM</sub> and T<sub>EMRA</sub> cells (scatter plots with median) transcribing *KLRB1*, *KLRG1*, *ADGRG1* (GPR56) and *KLRF1* from blood of healthy individuals (HC-B, n = 4) as well as blood (LD-B, n = 4) and liver samples (LD-L, n = 4) of patients with inflammatory biliary and hepatic diseases. Gene expression was determined by single cell qRT-PCR. Data are shown with mean.

## Supplementary figure 5: Pre-gating strategy for flow cytometry investigations

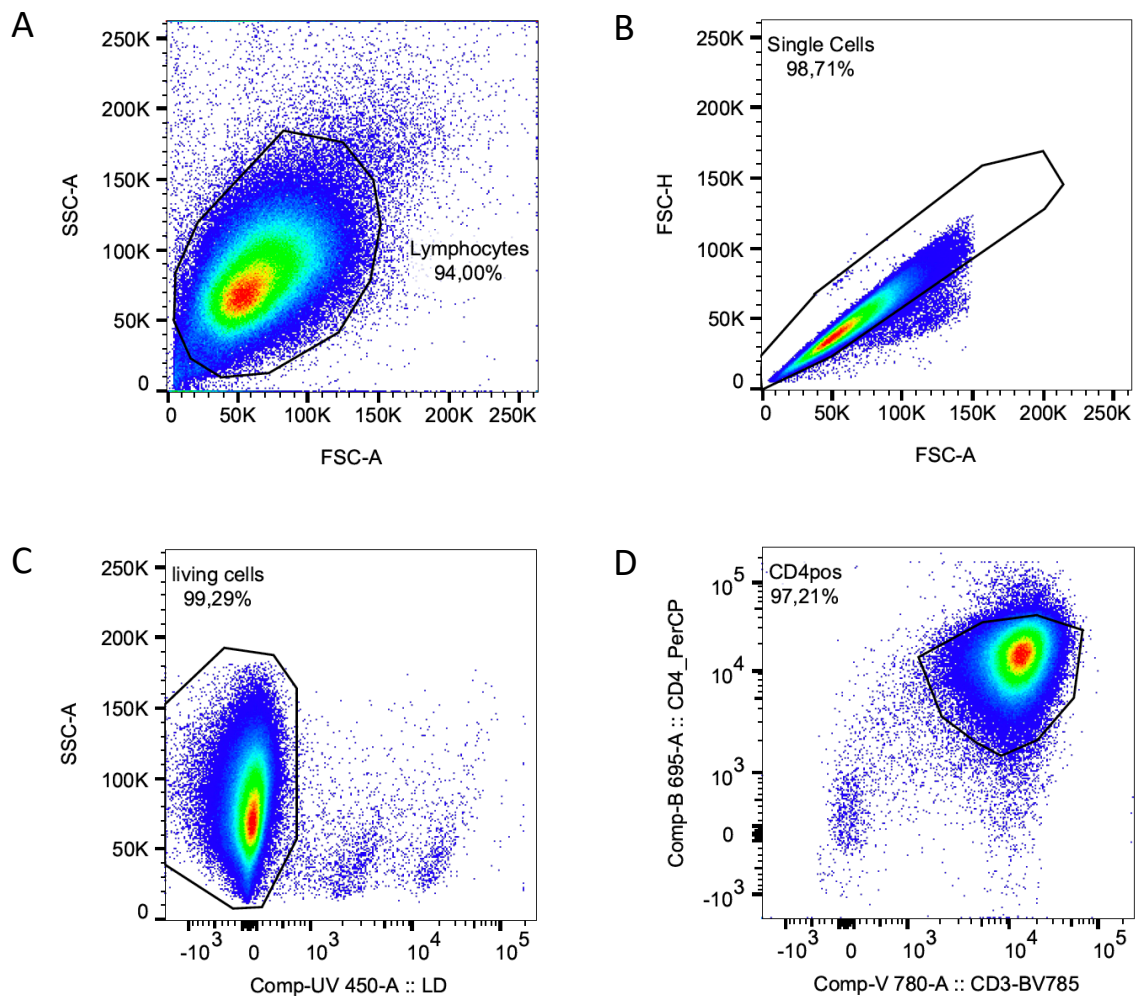

Exemplary hierarchical gating strategy to identify CD4<sup>+</sup> T cells.

All samples were pre-gated on (A) lymphocytes followed by (B) FSC-H/FSC-A-based doublet exclusion. (C) Living cells were discriminated from dead cells by viability staining. (D) T cells within living cells were identified by expression of CD3 and CD4. Original dot plots for the identification of subsequent populations are shown in the specific figures.

**Supplementary table 1:** List of genes and their log2 fold expression up-regulation identified by intersection analysis (e.g.  $T_{EMRA}/T_{EM}$  vs.  $T_N/T_{CM}$ ) of RNA microarray results from sorted human peripheral blood CD4<sup>+</sup> T<sub>N</sub>, T<sub>CM</sub>, T<sub>EM</sub> and T<sub>EMRA</sub> cells. Rows filled in grey mark genes with specifically increased expression in T<sub>EM</sub> cells compared to T<sub>N</sub> cells.

| Gene symbol | Fold change                              |                          |                            | Gene name                                                           |
|-------------|------------------------------------------|--------------------------|----------------------------|---------------------------------------------------------------------|
|             | $T_{EMRA}/T_{EM}$ vs $T_N/T_{CM}$ [log2] | $T_{EM}$ vs $T_N$ [log2] | $T_{EMRA}$ vs $T_N$ [log2] |                                                                     |
| S1PR5       | 6.306                                    | 4.003                    | 7.107                      | Sphingosine-1-Phosphate Receptor 5                                  |
| GPR56       | 6.74                                     | 4.157                    | 7.852                      | G protein-coupled receptor 56                                       |
| CXCR1       | 6.263                                    | 3.176                    | 7.814                      | C-X-C motif chemokine receptor 1                                    |
| NKG7        | 6.295                                    | 4.589                    | 7.779                      | natural killer cell granule protein 7                               |
| CMKLR1      | 5.682                                    | 3.709                    | 6.92                       | Chemokine like receptor 1                                           |
| SLAMF7      | 5.059                                    | 3.989                    | 6.952                      | SLAM Family Member 7                                                |
| FASLG       | 4.719                                    | 4.307                    | 7.173                      | Fas ligand                                                          |
| KLRF1       | 3.805                                    | 1.689                    | 4.646                      | killer cell lectin like receptor F1                                 |
| OR10H2      | 3.855                                    | 2.211                    | 4.739                      | olfactory receptor family 10 subfamily H member 2                   |
| ENPP5       | 3.58                                     | 1.884                    | 4.826                      | ectonucleotide pyrophosphatase/phosphodiesterase 5                  |
| PCDHGA7     | 3.085                                    | 1.873                    | 3.906                      | protocadherin gamma subfamily A, 7                                  |
| CD300A      | 2.728                                    | 1.777                    | 4.105                      | Cluster of Differentiation 300A                                     |
| HRH3        | 2.325                                    | 1.442                    | 2.994                      | Histamine H3 receptor                                               |
| SLC4A4      | 2.585                                    | 1.235                    | 3.412                      | Solute carrier family 4                                             |
| FZD2        | 2.281                                    | 0.901                    | 3.56                       | frizzled class receptor 2                                           |
| HLA-DRB4    | 2.268                                    | 2.114                    | 3.804                      | Major histocompatibility complex, class II, DR beta 4               |
| PTCHI       | 2.295                                    | 0.842                    | 2.773                      | patched 1                                                           |
| CD300C      | 2.404                                    | 1.59                     | 3.795                      | Cluster of Differentiation 300C                                     |
| KLRG1       | 2.515                                    | 2.618                    | 3.924                      | killer cell lectin like receptor G1                                 |
| LAG3        | 2.433                                    | 2.362                    | 3.94                       | Lymphocyte-activation protein 3                                     |
| HLA-DRB5    | 2.282                                    | 2.554                    | 3.738                      | major histocompatibility complex, class II, DR beta 5               |
| HLA-DRB1    | 2.137                                    | 2.156                    | 3.197                      | major histocompatibility complex, class II, DR beta 1               |
| SLC27A3     | 2.066                                    | 1.68                     | 2.834                      | solute carrier family 27 member 3                                   |
| MCTP2       | 1.708                                    | 0.828                    | 2.399                      | multiple C2 and transmembrane domain containing 2                   |
| HLA-DRB5    | 2.025                                    | 2.25                     | 3.532                      | major histocompatibility complex, class II, DR beta 5               |
| FCRL3       | 1.466                                    | 2.173                    | 3.557                      | Fc receptor like 3                                                  |
| HCST        | 1.505                                    | 0.888                    | 2.034                      | hematopoietic cell signal transducer                                |
| LPCAT1      | 1.557                                    | 0.768                    | 1.955                      | lysophosphatidylcholine acyltransferase 1                           |
| SPN         | 1.517                                    | 0.905                    | 2.107                      | sialophorin                                                         |
| TLR3        | 1.682                                    | 2.621                    | 3.778                      | toll like receptor 3                                                |
| SIGLEC9     | 1.265                                    | 0.564                    | 1.899                      | sialic acid binding Ig like lectin 9                                |
| SLC8A1      | 1.044                                    | 0.835                    | 2.436                      | solute carrier family 8 member A1                                   |
| CD99        | 1.509                                    | 1.435                    | 2.598                      | Cluster of differentiation 99                                       |
| LILRB3      | 1.177                                    | 0.7                      | 1.912                      | leukocyte immunoglobulin like receptor B3                           |
| FCGR2A      | 1.041                                    | 0.349                    | 2.059                      | Fc fragment of IgG receptor IIa                                     |
| ITGAX       | 0.677                                    | -0.013                   | 1.335                      | integrin subunit alpha X                                            |
| ERBB2       | 0.543                                    | -0.783                   | 1.032                      | erb-b2 receptor tyrosine kinase 2                                   |
| TLR4        | 1.049                                    | 0.411                    | 1.43                       | toll like receptor 4                                                |
| SLC2A6      | 0.788                                    | -0.12                    | 1.108                      | solute carrier family 2 (facilitated glucose transporter), member 6 |
| KIT         | 0.876                                    | 1.791                    | 0.059                      | KIT proto-oncogene receptor tyrosine kinase                         |
| ASB2        | 0.619                                    | 1.78                     | 1.39                       | ankyrin Repeat And SOCS Box Containing 2                            |
| PPARG       | 0.617                                    | 0.992                    | 0.082                      | peroxisome proliferator activated receptor gamma                    |
| HLF         | 0.4                                      | 1.214                    | 0.668                      | hepatic leukemia factor                                             |
| NMU         | 0.661                                    | 1.997                    | 1.026                      | Neuromedin U                                                        |
| KLRB1       | 0.287                                    | 0.704                    | 0.518                      | killer cell lectin like receptor B1                                 |

**Supplementary table 2: List of TaqMan Gene Expression Assays used within single cell qRT-PCR**

| No. | Gene Symbol    | Transcript (Refseq) | Assay ID      | Exon Boundary | Assay Location (bp) | Amplicon Length (bp) | Gene Length (bp) |
|-----|----------------|---------------------|---------------|---------------|---------------------|----------------------|------------------|
| 1   | AQP9           | NM_020980           | Hs01035888_m1 | 5-6           | 1065                | 98                   | 3033             |
| 2   | RETN           | NM_020415           | Hs00220767_m1 | 3-4           | 242                 | 130                  | 478              |
| 3   | RNASE2         | NM_002934           | Hs00795553_s1 | 2-2           | 379                 | 91                   | 735              |
| 4   | RNASE3         | NM_002935           | Hs03046240_s1 | 2-2           | 479                 | 140                  | 712              |
| 5   | LTF            | NM_002343           | Hs00914330_m1 | 16-17         | 2340                | 92                   | 2627             |
| 6   | CA1            | NM_001738           | Hs01100176_m1 | 8-9           | 836                 | 86                   | 1278             |
| 7   | LCN2           | NM_005564           | Hs01008571_m1 | 5-6           | 642                 | 61                   | 840              |
| 8   | S100A9         | NM_002965           | Hs00610058_m1 | 2-3           | 188                 | 83                   | 586              |
| 9   | C19orf59       | NM_174918           | Hs00545332_m1 | 1-2           | 121                 | 109                  | 1326             |
| 10  | FPR1           | NM_002029           | Hs00181830_m1 | 1-2           | 88                  | 132                  | 1334             |
| 11  | S100A8         | NM_002964           | Hs00374263_m1 | 1-2           | 148                 | 70                   | 532              |
| 12  | FCGR1B         | NM_001017986        | Hs02341825_m1 | 4-5           | 615                 | 86                   | 1917             |
| 13  | S100A12        | NM_005621           | Hs00194525_m1 | 1-2           | 46                  | 63                   | 466              |
| 14  | MS4A4A         | NM_024021           | Hs00254770_m1 | 3-4           | 480                 | 80                   | 1814             |
| 15  | GPER           | NM_001039966        | Hs01116133_m1 | 2-3           | 563                 | 60                   | 2981             |
| 16  | APOBEC3H       | NM_181773           | Hs03989381_m1 | 4-5           | 670                 | 107                  | 1070             |
| 17  | S1PR5          | NM_030760           | Hs00928195_s1 | 2-2           | 1977                | 86                   | 2351             |
| 18  | GPR56          | NM_201525           | Hs00938469_m1 | 13 - 14       | 2266                | 68                   | 4133             |
| 19  | NKG7           | NM_005601           | Hs01120688_g1 | 3-4           | 616                 | 65                   | 826              |
| 20  | ADRB2          | NM_000024           | Hs00240532_s1 | 1-1           | 778                 | 65                   | 2058             |
| 21  | CMKLR1         | NM_004072           | Hs03063327_m1 | 1-2           | 287                 | 54                   | 5420             |
| 22  | PTGDR          | NM_000953           | Hs00235003_m1 | 1-2           | 950                 | 72                   | 2966             |
| 23  | NMUR1          | NM_006056           | Hs00173804_m1 | 2-3           | 1014                | 60                   | 3274             |
| 24  | GPR114         | NM_153837           | Hs00542389_m1 | 10-11         | 1728                | 74                   | 3848             |
| 25  | LAIR2          | NM_002288           | Hs00357971_m1 | 4-5           | 536                 | 71                   | 702              |
| 26  | CADM1          | NM_014333           | Hs00942509_m1 | 3-4           | 549                 | 77                   | 4324             |
| 27  | KLRF1          | NM_016523           | Hs00212979_m1 | 3-4           | 398                 | 70                   | 1242             |
| 28  | CD300A         | NM_007261           | Hs00381974_m1 | 3-4           | 856                 | 88                   | 1893             |
| 29  | KLRG1          | NM_005810           | Hs00929964_m1 | 3-4           | 370                 | 83                   | 1815             |
| 30  | CD300C         | NM_006678           | Hs01088618_m1 | 1-2           | 451                 | 100                  | 1602             |
| 31  | TLR3           | NM_003265           | Hs01551078_m1 | 3-4           | 738                 | 132                  | 3057             |
| 32  | KIT            | NM_000222           | Hs00922198_m1 | 16 - 17       | 2442                | 75                   | 5190             |
| 33  | ASB2           | NM_016150           | Hs00387867_m1 | 4-5           | 1225                | 55                   | 2756             |
| 34  | KLRB1          | NM_002258           | Hs00935894_m1 | 2-3           | 249                 | 90                   | 740              |
| 35  | CDO1           | NM_001801           | Hs00156447_m1 | 1-2           | 482                 | 66                   | 1627             |
| 36  | GPR44          | NM_004778           | Hs00173717_m1 | 1-2           | 105                 | 71                   | 2910             |
| 37  | KRT1           | NM_006121           | Hs00196158_m1 | 6-7           | 1316                | 86                   | 2451             |
| 38  | CA6            | NM_001215           | Hs00154196_m1 | 2-3           | 316                 | 77                   | 1378             |
| 39  | SELL           | NM_000655           | Hs01053460_m1 | 7-8           | 1288                | 79                   | 2206             |
| 49  | PTPRC(CD45RA?) | NM_001267798        | Hs04189704_m1 | 2-3           | 280                 | 57                   | 1477             |
| 40  | spike 1        |                     | AIOIX5E       |               |                     |                      |                  |
| 41  | HPRT1          |                     | Hs02800695_m1 | 2-3           | 297                 | 82                   | 1435             |
| 42  | B2M            |                     | Hs00984230_m1 | 3-4           | 431                 | 81                   | 987              |
| 43  | FOXP3          |                     | Hs00203958_m1 | 9-10          | 1132                | 64                   | 2292             |
| 44  | EOMES          | NM_005442           | Hs00172872_m1 | 2-3           | 1458                | 81                   | 3617             |
| 45  | GATA3          | NM_001002295        | Hs00922328_m1 | 4-5           | 1485                | 86                   | 3070             |



**Supplementary table 3:** Frequency of transcript expressing T cell populations upon single cell gene expression profiling

| Gene     | Populations    |      |                 |      |                 |      |                   |      |                  |      |
|----------|----------------|------|-----------------|------|-----------------|------|-------------------|------|------------------|------|
|          | T <sub>N</sub> |      | T <sub>CM</sub> |      | T <sub>EM</sub> |      | T <sub>EMRA</sub> |      | T <sub>reg</sub> |      |
|          | mean           | SEM  | mean            | SEM  | mean            | SEM  | mean              | SEM  | mean             | SEM  |
| RNASE2   | 27.34          | 6.38 | 8.33            | 2.63 | 16.60           | 7.00 | 11.36             | 3.70 | 18.23            | 5.66 |
| RNASE3   | 22.44          | 6.74 | 7.15            | 2.15 | 19.64           | 6.56 | 15.41             | 3.94 | 19.27            | 5.60 |
| LTF      | 0.00           | 0.00 | 0.00            | 0.00 | 0.00            | 0.00 | 0.00              | 0.00 | 10.16            | 5.08 |
| S1PR5    | 1.67           | 0.83 | 0.00            | 0.00 | 2.86            | 0.84 | 6.46              | 1.24 | 0.00             | 0.00 |
| NKG7     | 3.45           | 1.00 | 2.53            | 1.02 | 66.70           | 6.07 | 92.51             | 1.62 | 1.82             | 0.54 |
| ADRB2    | 5.16           | 1.63 | 2.89            | 0.96 | 24.48           | 6.64 | 35.99             | 3.81 | 6.77             | 1.79 |
| CMKLR1   | 3.45           | 1.00 | 0.00            | 0.00 | 20.38           | 1.54 | 30.32             | 4.15 | 1.65             | 0.31 |
| PTGDR    | 5.24           | 1.70 | 8.43            | 0.60 | 23.65           | 0.42 | 28.32             | 1.93 | 0.39             | 0.20 |
| NMUR1    | 0.00           | 0.00 | 0.36            | 0.18 | 4.77            | 0.46 | 5.18              | 1.50 | 0.39             | 0.20 |
| GPR114   | 3.35           | 0.74 | 1.43            | 0.71 | 24.85           | 1.89 | 43.46             | 3.18 | 2.73             | 1.12 |
| LAIR2    | 4.25           | 1.70 | 5.49            | 1.38 | 16.08           | 2.41 | 15.31             | 1.09 | 12.66            | 2.05 |
| CADM1    | 0.00           | 0.00 | 3.71            | 0.72 | 9.74            | 2.19 | 15.47             | 2.32 | 3.99             | 0.91 |
| KLRF1    | 1.67           | 0.83 | 0.00            | 0.00 | 12.98           | 3.65 | 27.61             | 6.41 | 0.39             | 0.20 |
| CD300A   | 6.03           | 1.56 | 30.60           | 4.20 | 57.69           | 6.53 | 80.04             | 3.20 | 3.47             | 1.03 |
| KLRG1    | 10.62          | 1.29 | 16.96           | 0.95 | 67.08           | 3.64 | 84.43             | 2.87 | 2.34             | 1.17 |
| TLR3     | 0.00           | 0.00 | 2.90            | 0.60 | 6.57            | 1.12 | 5.60              | 0.68 | 0.00             | 0.00 |
| ASB2     | 0.00           | 0.00 | 4.35            | 1.23 | 3.64            | 0.81 | 1.73              | 0.36 | 0.78             | 0.39 |
| KLRB1    | 0.89           | 0.45 | 36.85           | 4.34 | 32.06           | 4.07 | 15.93             | 0.79 | 12.27            | 1.06 |
| GPR44    | 0.00           | 0.00 | 3.96            | 1.73 | 1.09            | 0.54 | 0.00              | 0.00 | 1.56             | 0.78 |
| KRT1     | 4.23           | 1.58 | 2.50            | 1.03 | 0.00            | 0.00 | 0.00              | 0.00 | 1.82             | 0.54 |
| SELL     | 93.10          | 2.00 | 63.29           | 1.13 | 18.49           | 4.12 | 36.00             | 6.75 | 81.75            | 2.55 |
| CD45RA   | 89.72          | 4.29 | 12.09           | 4.05 | 11.91           | 3.16 | 75.29             | 4.43 | 18.96            | 5.03 |
| HPRT     | 23.05          | 1.98 | 30.70           | 2.58 | 26.76           | 2.13 | 26.07             | 2.09 | 38.86            | 3.04 |
| β2M      | 100.00         | 0.00 | 100.00          | 0.00 | 100.00          | 0.00 | 100.00            | 0.00 | 100.00           | 0.00 |
| FOP3     | 0.68           | 0.34 | 4.44            | 1.27 | 2.66            | 0.51 | 0.50              | 0.25 | 87.03            | 2.64 |
| EOMES    | 5.02           | 0.55 | 2.92            | 0.58 | 42.99           | 2.77 | 55.04             | 3.32 | 1.17             | 0.59 |
| GATA3    | 40.11          | 2.90 | 70.91           | 0.83 | 63.30           | 2.78 | 59.45             | 3.49 | 66.97            | 3.13 |
| RORC     | 0.00           | 0.00 | 6.89            | 1.51 | 6.20            | 1.05 | 1.27              | 0.40 | 4.60             | 1.00 |
| CX3CR1   | 3.45           | 1.00 | 1.43            | 0.71 | 59.46           | 4.77 | 73.76             | 3.66 | 2.69             | 0.67 |
| APOBEC3H | 0.00           | 0.00 | 6.10            | 1.94 | 13.23           | 0.56 | 12.66             | 2.21 | 2.82             | 0.65 |
| KIT      | 0.00           | 0.00 | 0.00            | 0.00 | 1.00            | 0.50 | 0.00              | 0.00 | 0.00             | 0.00 |
| GPR56    | 4.35           | 0.83 | 2.14            | 1.07 | 51.18           | 3.89 | 82.04             | 1.88 | 0.39             | 0.20 |



## References:

1. Josefsson, S.E., et al., *TIGIT and PD-1 mark intratumoral T cells with reduced effector function in B-cell non-Hodgkin lymphoma*. *Cancer Immunol Res*, 2019. **18**: p. 2326-6066.
2. Cockerham, L.R., et al., *Programmed death-1 expression on CD4(+) and CD8(+) T cells in treated and untreated HIV disease*. *AIDS*, 2014. **28**(12): p. 1749-58. doi: 10.1097/QAD.0000000000000314.
3. Crawford, A., et al., *Molecular and transcriptional basis of CD4(+) T cell dysfunction during chronic infection*. *Immunity*, 2014. **40**(2): p. 289-302. doi: 10.1016/j.immuni.2014.01.005. Epub 2014 Feb 13.
4. Rosignoli, G., et al., *Programmed death (PD)-1 molecule and its ligand PD-L1 distribution among memory CD4 and CD8 T cell subsets in human immunodeficiency virus-1-infected individuals*. *Clin Exp Immunol*, 2009. **157**(1): p. 90-7. doi: 10.1111/j.1365-2249.2009.03960.x.
5. Agata, Y., et al., *Expression of the PD-1 antigen on the surface of stimulated mouse T and B lymphocytes*. *Int Immunol*, 1996. **8**(5): p. 765-72.
6. Anderson, A.C., N. Joller, and V.K. Kuchroo, *Lag-3, Tim-3, and TIGIT: Co-inhibitory Receptors with Specialized Functions in Immune Regulation*. *Immunity*, 2016. **44**(5): p. 989-1004. doi: 10.1016/j.immuni.2016.05.001.
7. McMahan, R.H., et al., *Tim-3 expression on PD-1+ HCV-specific human CTLs is associated with viral persistence, and its blockade restores hepatocyte-directed in vitro cytotoxicity*. *J Clin Invest*, 2010. **120**(12): p. 4546-57. doi: 10.1172/JCI43127. Epub 2010 Nov 15.
8. Fromentin, R., et al., *CD4+ T Cells Expressing PD-1, TIGIT and LAG-3 Contribute to HIV Persistence during ART*. *PLoS Pathog*, 2016. **12**(7): p. e1005761. doi: 10.1371/journal.ppat.1005761. eCollection 2016 Jul.
9. Goding, S.R., et al., *Restoring immune function of tumor-specific CD4+ T cells during recurrence of melanoma*. *J Immunol*, 2013. **190**(9): p. 4899-909. doi: 10.4049/jimmunol.1300271. Epub 2013 Mar 27.
10. Tian, X., et al., *The upregulation of LAG-3 on T cells defines a subpopulation with functional exhaustion and correlates with disease progression in HIV-infected subjects*. *J Immunol*, 2015. **194**(8): p. 3873-82. doi: 10.4049/jimmunol.1402176. Epub 2015 Mar 16.
11. Tassi, E., et al., *Early Effector T Lymphocytes Coexpress Multiple Inhibitory Receptors in Primary Non-Small Cell Lung Cancer*. *Cancer Res*, 2017. **77**(4): p. 851-861. doi: 10.1158/0008-5472.CAN-16-1387. Epub 2016 Dec 15.
12. Bengsch, B., et al., *Coexpression of PD-1, 2B4, CD160 and KLRG1 on exhausted HCV-specific CD8+ T cells is linked to antigen recognition and T cell differentiation*. *PLoS Pathog*, 2010. **6**(6): p. e1000947. doi: 10.1371/journal.ppat.1000947.
13. Blackburn, S.D., et al., *Coregulation of CD8+ T cell exhaustion by multiple inhibitory receptors during chronic viral infection*. *Nat Immunol*, 2009. **10**(1): p. 29-37. doi: 10.1038/ni.1679. Epub 2008 Nov 30.
14. Chauvin, J.M., et al., *TIGIT and PD-1 impair tumor antigen-specific CD8(+) T cells in melanoma patients*. *J Clin Invest*, 2015. **125**(5): p. 2046-58. doi: 10.1172/JCI80445. Epub 2015 Apr 13.
15. Legat, A., et al., *Inhibitory Receptor Expression Depends More Dominantly on Differentiation and Activation than "Exhaustion" of Human CD8 T Cells*. *Front Immunol*, 2013. **4**:455.(doi): p. 10.3389/fimmu.2013.00455. eCollection 2013.
16. Catakovic, K., et al., *TIGIT expressing CD4+T cells represent a tumor-supportive T cell subset in chronic lymphocytic leukemia*. *Oncoimmunology*, 2017. **7**(1): p. e1371399. doi: 10.1080/2162402X.2017.1371399. eCollection 2017.
17. Yu, X., et al., *The surface protein TIGIT suppresses T cell activation by promoting the generation of mature immunoregulatory dendritic cells*. *Nat Immunol*, 2009. **10**(1): p. 48-57. doi: 10.1038/ni.1674. Epub 2008 Nov 16.
18. Boles, K.S., et al., *A novel molecular interaction for the adhesion of follicular CD4 T cells to follicular DC*. *Eur J Immunol*, 2009. **39**(3): p. 695-703. doi: 10.1002/eji.200839116.

19. Joller, N., et al., *Cutting edge: TIGIT has T cell-intrinsic inhibitory functions*. J Immunol., 2011. **186**(3): p. 1338-42. doi: 10.4049/jimmunol.1003081. Epub 2011 Jan 3.
20. Levin, S.D., et al., *Vstm3 is a member of the CD28 family and an important modulator of T-cell function*. Eur J Immunol., 2011. **41**(4): p. 902-15. doi: 10.1002/eji.201041136. Epub 2011 Mar 18.
21. Johnston, R.J., et al., *The immunoreceptor TIGIT regulates antitumor and antiviral CD8(+) T cell effector function*. Cancer Cell., 2014. **26**(6): p. 923-937. doi: 10.1016/j.ccell.2014.10.018. Epub 2014 Nov 26.
22. Song, Y., et al., *T-cell Immunoglobulin and ITIM Domain Contributes to CD8(+) T-cell Immunosenescence*. Aging Cell., 2018. **17**(2).(doi): p. 10.1111/ace1.12716. Epub 2018 Jan 19.
23. Hastings, W.D., et al., *TIM-3 is expressed on activated human CD4+ T cells and regulates Th1 and Th17 cytokines*. Eur J Immunol., 2009. **39**(9): p. 2492-501. doi: 10.1002/eji.200939274.
24. Jones, R.B., et al., *Tim-3 expression defines a novel population of dysfunctional T cells with highly elevated frequencies in progressive HIV-1 infection*. J Exp Med., 2008. **205**(12): p. 2763-79. doi: 10.1084/jem.20081398. Epub 2008 Nov 10.
25. Qiu, Y., et al., *Tim-3-expressing CD4+ and CD8+ T cells in human tuberculosis (TB) exhibit polarized effector memory phenotypes and stronger anti-TB effector functions*. PLoS Pathog, 2012. **8**(11): p. e1002984. doi: 10.1371/journal.ppat.1002984. Epub 2012 Nov 8.
26. Kim, J.E., et al., *Combination Therapy with Anti-PD-1, Anti-TIM-3, and Focal Radiation Results in Regression of Murine Gliomas*. Clin Cancer Res., 2017. **23**(1): p. 124-136. doi: 10.1158/1078-0432.CCR-15-1535. Epub 2016 Jun 29.
27. Zhu, C., et al., *An IL-27/NFIL3 signalling axis drives Tim-3 and IL-10 expression and T-cell dysfunction*. Nat Commun., 2015. **6**:6072.(doi): p. 10.1038/ncomms7072.
28. Kim, J., et al., *Memory programming in CD8(+) T-cell differentiation is intrinsic and is not determined by CD4 help*. Nat Commun., 2015. **6**:7994.(doi): p. 10.1038/ncomms8994.
29. Sakuishi, K., et al., *Targeting Tim-3 and PD-1 pathways to reverse T cell exhaustion and restore anti-tumor immunity*. J Exp Med., 2010. **207**(10): p. 2187-94. doi: 10.1084/jem.20100643. Epub 2010 Sep 6.
30. Zhou, Q., et al., *Coexpression of Tim-3 and PD-1 identifies a CD8+ T-cell exhaustion phenotype in mice with disseminated acute myelogenous leukemia*. Blood., 2011. **117**(17): p. 4501-10. doi: 10.1182/blood-2010-10-310425. Epub 2011 Mar 8.
31. Workman, C.J., et al., *Phenotypic analysis of the murine CD4-related glycoprotein, CD223 (LAG-3)*. Eur J Immunol., 2002. **32**(8): p. 2255-63. doi: 10.1002/1521-4141(200208)32:8<2255::AID-IMMU2255>3.0.CO;2-A.
32. Villegas-Mendez, A., et al., *Long-Lived CD4+IFN-gamma+ T Cells rather than Short-Lived CD4+IFN-gamma+IL-10+ T Cells Initiate Rapid IL-10 Production To Suppress Anamnestic T Cell Responses during Secondary Malaria Infection*. J Immunol., 2016. **197**(8): p. 3152-3164. doi: 10.4049/jimmunol.1600968. Epub 2016 Sep 14.
33. Triebel, F., et al., *LAG-3, a novel lymphocyte activation gene closely related to CD4*. J Exp Med., 1990. **171**(5): p. 1393-405.
34. Nakajima, H., et al., *Activating interactions in human NK cell recognition: the role of 2B4-CD48*. Eur J Immunol., 1999. **29**(5): p. 1676-83. doi: 10.1002/(SICI)1521-4141(199905)29:05<1676::AID-IMMU1676>3.0.CO;2-Y.
35. Noval Rivas, M., et al., *NK cell regulation of CD4 T cell-mediated graft-versus-host disease*. J Immunol., 2010. **184**(12): p. 6790-8. doi: 10.4049/jimmunol.0902598. Epub 2010 May 19.
36. Romero, X., et al., *Differential expression of SAP and EAT-2-binding leukocyte cell-surface molecules CD84, CD150 (SLAM), CD229 (Ly9) and CD244 (2B4)*. Tissue Antigens., 2004. **64**(2): p. 132-44. doi: 10.1111/j.1399-0039.2004.00247.x.
37. Kambayashi, T., et al., *Cutting edge: Regulation of CD8(+) T cell proliferation by 2B4/CD48 interactions*. J Immunol., 2001. **167**(12): p. 6706-10.
38. Speiser, D.E., et al., *The activatory receptor 2B4 is expressed in vivo by human CD8+ effector alpha beta T cells*. J Immunol., 2001. **167**(11): p. 6165-70.

39. Tsujimura, K., et al., *Characterization of murine CD160+ CD8+ T lymphocytes*. Immunol Lett., 2006. **106**(1): p. 48-56. doi: 10.1016/j.imlet.2006.04.006. Epub 2006 May 11.
40. El-Far, M., et al., *CD160 isoforms and regulation of CD4 and CD8 T-cell responses*. J Transl Med., 2014. **12**:217.(doi): p. 10.1186/s12967-014-0217-y.
41. Paris, R.M., et al., *Selective Loss of Early Differentiated, Highly Functional PD1high CD4 T Cells with HIV Progression*. PLoS One., 2015. **10**(12): p. e0144767. doi: 10.1371/journal.pone.0144767. eCollection 2015.
42. Porichis, F., et al., *Responsiveness of HIV-specific CD4 T cells to PD-1 blockade*. Blood., 2011. **118**(4): p. 965-74. doi: 10.1182/blood-2010-12-328070. Epub 2011 Jun 7.
43. Xia, H., et al., *Elevated Level of CD4(+) T Cell Immune Activation in Acutely HIV-1-Infected Stage Associates With Increased IL-2 Production and Cycling Expression, and Subsequent CD4(+) T Cell Preservation*. Front Immunol., 2018. **9**:616.(doi): p. 10.3389/fimmu.2018.00616. eCollection 2018.
44. Sako, N., et al., *Membrane expression of NK receptors CD160 and CD158k contributes to delineate a unique CD4+ T-lymphocyte subset in normal and mycosis fungoides skin*. Cytometry A., 2014. **85**(10): p. 869-82. doi: 10.1002/cyto.a.22512. Epub 2014 Jul 18.
45. Hassouneh, F., et al., *Differential Effect of Cytomegalovirus Infection with Age on the Expression of CD57, CD300a, and CD161 on T-Cell Subpopulations*. Front Immunol., 2017. **8**:649.(doi): p. 10.3389/fimmu.2017.00649. eCollection 2017.
46. Iliopoulou, E.G., et al., *Increased frequency of CD4+ cells expressing CD161 in cancer patients*. Clin Cancer Res., 2006. **12**(23): p. 6901-9. doi: 10.1158/1078-0432.CCR-06-0977.
47. Lanier, L.L., C. Chang, and J.H. Phillips, *Human NKR-P1A. A disulfide-linked homodimer of the C-type lectin superfamily expressed by a subset of NK and T lymphocytes*. J Immunol., 1994. **153**(6): p. 2417-28.
48. Rodriguez, M.W., et al., *Differential gene expression by integrin beta 7+ and beta 7- memory T helper cells*. BMC Immunol., 2004. **5**:13.(doi): p. 10.1186/1471-2172-5-13.
49. Northfield, J.W., et al., *CD161 expression on hepatitis C virus-specific CD8+ T cells suggests a distinct pathway of T cell differentiation*. Hepatology., 2008. **47**(2): p. 396-406. doi: 10.1002/hep.22040.
50. Beyersdorf, N., et al., *Characterization of mouse CD4 T cell subsets defined by expression of KLRG1*. Eur J Immunol., 2007. **37**(12): p. 3445-54. doi: 10.1002/eji.200737126.
51. Cyktor, J.C., et al., *Killer cell lectin-like receptor G1 deficiency significantly enhances survival after Mycobacterium tuberculosis infection*. Infect Immun., 2013. **81**(4): p. 1090-9. doi: 10.1128/IAI.01199-12. Epub 2013 Jan 22.
52. Di Mitri, D., et al., *Reversible senescence in human CD4+CD45RA+CD27- memory T cells*. J Immunol., 2011. **187**(5): p. 2093-100. doi: 10.4049/jimmunol.1100978. Epub 2011 Jul 25.
53. Lindenstrom, T., et al., *Control of chronic mycobacterium tuberculosis infection by CD4 KLRG1- IL-2-secreting central memory cells*. J Immunol., 2013. **190**(12): p. 6311-9. doi: 10.4049/jimmunol.1300248. Epub 2013 May 15.
54. Raziorrouh, B., et al., *Inhibitory phenotype of HBV-specific CD4+ T-cells is characterized by high PD-1 expression but absent coregulation of multiple inhibitory molecules*. PLoS One., 2014. **9**(8): p. e105703. doi: 10.1371/journal.pone.0105703. eCollection 2014.
55. Reiley, W.W., et al., *Distinct functions of antigen-specific CD4 T cells during murine Mycobacterium tuberculosis infection*. Proc Natl Acad Sci U S A., 2010. **107**(45): p. 19408-13. doi: 10.1073/pnas.1006298107. Epub 2010 Oct 20.
56. Voehringer, D., M. Koschella, and H. Pircher, *Lack of proliferative capacity of human effector and memory T cells expressing killer cell lectinlike receptor G1 (KLRG1)*. Blood., 2002. **100**(10): p. 3698-702. doi: 10.1182/blood-2002-02-0657. Epub 2002 Jul 12.
57. Joshi, N.S., et al., *Inflammation directs memory precursor and short-lived effector CD8(+) T cell fates via the graded expression of T-bet transcription factor*. Immunity., 2007. **27**(2): p. 281-95. doi: 10.1016/j.immuni.2007.07.010.

58. Angelosanto, J.M., et al., *Progressive loss of memory T cell potential and commitment to exhaustion during chronic viral infection*. J Virol., 2012. **86**(15): p. 8161-70. doi: 10.1128/JVI.00889-12. Epub 2012 May 23.
59. Sarkar, S., et al., *Functional and genomic profiling of effector CD8 T cell subsets with distinct memory fates*. J Exp Med., 2008. **205**(3): p. 625-40. doi: 10.1084/jem.20071641. Epub 2008 Mar 3.
60. Voehringer, D., et al., *Viral infections induce abundant numbers of senescent CD8 T cells*. J Immunol., 2001. **167**(9): p. 4838-43.
61. Peng, Y.M., et al., *Specific expression of GPR56 by human cytotoxic lymphocytes*. J Leukoc Biol., 2011. **90**(4): p. 735-40. doi: 10.1189/jlb.0211092. Epub 2011 Jul 1.
62. Kuttruff, S., et al., *NKp80 defines and stimulates a reactive subset of CD8 T cells*. Blood., 2009. **113**(2): p. 358-69. doi: 10.1182/blood-2008-03-145615. Epub 2008 Oct 15.
